# Supplementary material for: Combinatorial Pharmacophore-Based 3D-QSAR Analysis and Virtual Screening of FGFR1 Inhibitors
Source: Int J Mol Sci. 2015 Jun 11;16(6):13407–26. doi: 10.3390/ijms160613407 (PMC4490501; doi:10.3390/ijms160613407)
Supplement: Supplementary file 1 [file ijms-16-13407-s001.xlsx]

## Sheet: training set
		Training set
cluster1	cluster2	cluster3	cluster4	cluster5	cluster6	cluster7	cluster8
BindingDB_4810	BindingDB_50181305	BindingDB_3051	BindingDB_4174	BindingDB_4168	BindingDB_50277584	BindingDB_50168388	BindingDB_3810
BindingDB_4811	BindingDB_50181311	BindingDB_3054	BindingDB_4188	BindingDB_4169	BindingDB_50420939	BindingDB_50168389	BindingDB_3818
BindingDB_4812	BindingDB_50181317	BindingDB_3056	BindingDB_4192	BindingDB_4172	BindingDB_50420941	BindingDB_50168390	BindingDB_3826
BindingDB_4813	BindingDB_50181320	BindingDB_3057	BindingDB_4604	BindingDB_4175	BindingDB_50420942	BindingDB_50168394	BindingDB_3846
BindingDB_4814	BindingDB_50265539	BindingDB_3059	BindingDB_4605	BindingDB_4176	BindingDB_50420944	BindingDB_50168395	BindingDB_3862
BindingDB_4815	BindingDB_50265572	BindingDB_3060	BindingDB_4606	BindingDB_4178	BindingDB_50420946	BindingDB_50168400	BindingDB_3868
BindingDB_4816	BindingDB_50265573	BindingDB_3062	BindingDB_4608	BindingDB_4179	BindingDB_50420947	BindingDB_50168403	BindingDB_3869
BindingDB_4817	BindingDB_50265615	BindingDB_3063	BindingDB_4610	BindingDB_4181	BindingDB_50420948	BindingDB_50168404	BindingDB_3927
BindingDB_4818	BindingDB_50265638	BindingDB_3065	BindingDB_4611	BindingDB_4183	BindingDB_50420949	BindingDB_50168406	BindingDB_3815
BindingDB_4819	BindingDB_50265639	BindingDB_3066	BindingDB_4612	BindingDB_4184	BindingDB_50420950	BindingDB_50168407	BindingDB_3922
BindingDB_4821	BindingDB_50265641	BindingDB_3067	BindingDB_4615	BindingDB_4185	BindingDB_50420951	BindingDB_50168410	BindingDB_3930
BindingDB_4822	BindingDB_50265675	BindingDB_3068	BindingDB_4617	BindingDB_4186	BindingDB_50420952	BindingDB_50184807	BindingDB_3926
BindingDB_4883	BindingDB_50265676	BindingDB_3069	BindingDB_4618	BindingDB_4187	BindingDB_50420953	BindingDB_50327073	BindingDB_3935
BindingDB_4888	BindingDB_50265677	BindingDB_3070	BindingDB_6146	BindingDB_4189	BindingDB_50420954	BindingDB_50327075	BindingDB_3948
BindingDB_4893	BindingDB_50265678	BindingDB_3071	BindingDB_6148	BindingDB_4190	BindingDB_50420955	BindingDB_50327076	BindingDB_3946
BindingDB_4894	BindingDB_50265679	BindingDB_3072	BindingDB_6149	BindingDB_4191	BindingDB_50420956	BindingDB_50327077	BindingDB_3936
BindingDB_4896	BindingDB_50265737	BindingDB_3073	BindingDB_6150	BindingDB_81377	BindingDB_50420958	BindingDB_50327090	BindingDB_3952
BindingDB_4897	BindingDB_50265738	BindingDB_3075	BindingDB_6151	BindingDB_50403060	BindingDB_50420960	BindingDB_50327092	BindingDB_3933
BindingDB_4898	BindingDB_50265739	BindingDB_3076	BindingDB_6152		BindingDB_50420961	BindingDB_50327097	BindingDB_3925
BindingDB_4899	BindingDB_50265740	BindingDB_3077	BindingDB_6154		BindingDB_50420962	BindingDB_50392791	BindingDB_3947
BindingDB_4900	BindingDB_50265743	BindingDB_3078	BindingDB_6156		BindingDB_50420963		BindingDB_3852
BindingDB_4903	BindingDB_50265745	BindingDB_3080	BindingDB_6157		BindingDB_50420964		BindingDB_3878
BindingDB_4904	BindingDB_50265751	BindingDB_3081	BindingDB_6158		BindingDB_50420965		BindingDB_3848
BindingDB_4907	BindingDB_50265752	BindingDB_3082	BindingDB_6162		BindingDB_50420967		BindingDB_3877
BindingDB_4910	BindingDB_50265753	BindingDB_3083	BindingDB_6163		BindingDB_50420968		BindingDB_3938
BindingDB_4911	BindingDB_50265771	BindingDB_3085	BindingDB_6166				BindingDB_50185185
BindingDB_4914	BindingDB_50265773	BindingDB_3086	BindingDB_6168				BindingDB_50185188
BindingDB_4915	BindingDB_50265774	BindingDB_3088	BindingDB_6170				BindingDB_50185179
BindingDB_4916	BindingDB_50265786	BindingDB_3089	BindingDB_6171				BindingDB_50185186
BindingDB_4917		BindingDB_3090	BindingDB_6172				BindingDB_50185176
BindingDB_4918		BindingDB_3093	BindingDB_6175				BindingDB_50185174
BindingDB_4919		BindingDB_3094	BindingDB_6176				BindingDB_50185183
BindingDB_4920		BindingDB_3095	BindingDB_6177				BindingDB_50185170
BindingDB_4921		BindingDB_3096	BindingDB_6178				BindingDB_50185172
BindingDB_50137570		BindingDB_3097	BindingDB_6179				BindingDB_50185177
BindingDB_50137573		BindingDB_3098	BindingDB_6182				BindingDB_50185182
BindingDB_50137574		BindingDB_3099	BindingDB_3428				BindingDB_50185173
BindingDB_50137580		BindingDB_3100	BindingDB_3429				BindingDB_50185181
BindingDB_50137582		BindingDB_3101	BindingDB_3430				BindingDB_50185178
BindingDB_50137583		BindingDB_3104	BindingDB_3431
BindingDB_50137584		BindingDB_3105	BindingDB_3436
BindingDB_50137587		BindingDB_4050	BindingDB_3439
BindingDB_50137591		BindingDB_4051	BindingDB_3441
BindingDB_50217602		BindingDB_4053	BindingDB_3442
BindingDB_50242737		BindingDB_4054	BindingDB_3443
BindingDB_50256010		BindingDB_4055	BindingDB_3445
BindingDB_50279198		BindingDB_4057	BindingDB_3446
BindingDB_50279238		BindingDB_4061	BindingDB_3447
BindingDB_50279269		BindingDB_4063	BindingDB_3450
BindingDB_50420995		BindingDB_4065	BindingDB_3451
BindingDB_50420996		BindingDB_4066	BindingDB_3455
BindingDB_50420998		BindingDB_4067	BindingDB_3457
BindingDB_50420999		BindingDB_4077	BindingDB_3459
BindingDB_50421001		BindingDB_4182	BindingDB_3461
BindingDB_50421002		BindingDB_4214	BindingDB_3463
BindingDB_50421003		BindingDB_6221	BindingDB_3464
BindingDB_50421004		BindingDB_6248	BindingDB_3467
BindingDB_50421005		BindingDB_6250	BindingDB_3468
BindingDB_50421006		BindingDB_6274	BindingDB_3469
BindingDB_50421007		BindingDB_6280	BindingDB_3470
BindingDB_50421009		BindingDB_6568	BindingDB_3472
BindingDB_50421010		BindingDB_6571	BindingDB_3473
BindingDB_50421012			BindingDB_3474
BindingDB_50421013			BindingDB_3475
BindingDB_50421014			BindingDB_3477
BindingDB_50421015			BindingDB_3478
BindingDB_50421016			BindingDB_3479
BindingDB_50421018			BindingDB_3480
BindingDB_50421019			BindingDB_3481
BindingDB_50421020			BindingDB_3483
BindingDB_50421021			BindingDB_3484
BindingDB_50421022			BindingDB_3485
BindingDB_50421023			BindingDB_3486
BindingDB_50421024			BindingDB_3487
BindingDB_50421025			BindingDB_3491
BindingDB_50421029			BindingDB_3492
BindingDB_50421030			BindingDB_3493
BindingDB_50421031			BindingDB_3498
BindingDB_50421032			BindingDB_3500
BindingDB_50421033			BindingDB_3501
BindingDB_50421035			BindingDB_4823
BindingDB_50421036			BindingDB_4826
BindingDB_50431812			BindingDB_4828
			BindingDB_4829
			BindingDB_4832
			BindingDB_4833
			BindingDB_4836
			BindingDB_4839
			BindingDB_4840
			BindingDB_4841
			BindingDB_4842
			BindingDB_4843
			BindingDB_4845
			BindingDB_4846
			BindingDB_4848
			BindingDB_6187
			BindingDB_6189
			BindingDB_6190
			BindingDB_6191

## Sheet: test set 
Test set
cluster1	cluster2	cluster3	cluster4	cluster5	cluster6	cluster7	cluster8
BindingDB_4367	BindingDB_50185167	BindingDB_93225	BindingDB_13216	BindingDB_11242	BindingDB_4664	BindingDB_50263183	BindingDB_4639
BindingDB_50263016	BindingDB_50181302	BindingDB_3432	BindingDB_50362976	BindingDB_4633	BindingDB_50321943	BindingDB_50178490	BindingDB_4637
BindingDB_84522	BindingDB_50181312	BindingDB_3490	BindingDB_3497	BindingDB_4607	BindingDB_50340576	BindingDB_4641	BindingDB_4657
BindingDB_50345462	BindingDB_50181304	BindingDB_6231	BindingDB_6160	BindingDB_6161	BindingDB_50340579	BindingDB_4638	BindingDB_4672
BindingDB_50345466	BindingDB_50181313	BindingDB_6278	BindingDB_3438	BindingDB_4193	BindingDB_50340567	BindingDB_4630	BindingDB_4668
BindingDB_84518	BindingDB_50181319	BindingDB_4068	BindingDB_4616	BindingDB_4180	BindingDB_50340571	BindingDB_4647	BindingDB_4673
BindingDB_50345470	BindingDB_50181306	BindingDB_4060	BindingDB_3434	BindingDB_4171	BindingDB_17744	BindingDB_13533	BindingDB_4678
BindingDB_50327912	BindingDB_50181307	BindingDB_4056	BindingDB_3496	BindingDB_4177	BindingDB_50340575	BindingDB_50307880	BindingDB_4683
BindingDB_50362979	BindingDB_50265574	BindingDB_3074	BindingDB_4614	BindingDB_4173	BindingDB_50340573	BindingDB_50402339	BindingDB_4680
BindingDB_50362982	BindingDB_50265640	BindingDB_4058	BindingDB_6155		BindingDB_50340569	BindingDB_50327091	BindingDB_4681
BindingDB_50362977	BindingDB_50265613	BindingDB_4076	BindingDB_3499		BindingDB_50420943	BindingDB_50327078	BindingDB_4675
BindingDB_50362981	BindingDB_50265614	BindingDB_4059	BindingDB_6169		BindingDB_50420945	BindingDB_50327082	BindingDB_4622
BindingDB_50279268	BindingDB_50265746	BindingDB_4074	BindingDB_3494		BindingDB_50420940	BindingDB_50168392	BindingDB_4669
BindingDB_50279236	BindingDB_50265744	BindingDB_3064	BindingDB_3495		BindingDB_50420966	BindingDB_50377357	BindingDB_50185180
BindingDB_50279080	BindingDB_50265772	BindingDB_3102	BindingDB_3489		BindingDB_50420959	BindingDB_50168405	BindingDB_3874
BindingDB_50279298	BindingDB_50265750	BindingDB_4052	BindingDB_6180		BindingDB_50420957	BindingDB_50377352	BindingDB_50185175
BindingDB_50279237		BindingDB_4213	BindingDB_6147			BindingDB_50168397	BindingDB_3865
BindingDB_50279267		BindingDB_3050	BindingDB_6153			BindingDB_50168402	BindingDB_3857
BindingDB_50279045		BindingDB_3087	BindingDB_6159			BindingDB_50168398	BindingDB_50185169
BindingDB_50279270		BindingDB_3092	BindingDB_3437			BindingDB_50168393	BindingDB_50185184
BindingDB_50065306		BindingDB_3058	BindingDB_4613			BindingDB_50168418	BindingDB_50185171
BindingDB_50137585		BindingDB_3091	BindingDB_4609			BindingDB_50168391	BindingDB_3855
BindingDB_50137578		BindingDB_6572	BindingDB_6167			BindingDB_50168387	BindingDB_3851
BindingDB_4820		BindingDB_3103	BindingDB_6164				BindingDB_3811
BindingDB_50137576		BindingDB_6569	BindingDB_6165				BindingDB_3849
BindingDB_50137581		BindingDB_6570	BindingDB_4830				BindingDB_3953
BindingDB_50421034		BindingDB_3055	BindingDB_4835				BindingDB_3932
BindingDB_50137569		BindingDB_3084	BindingDB_3476				BindingDB_3931
BindingDB_50137571		BindingDB_3079	BindingDB_4850				BindingDB_3854
BindingDB_50420997			BindingDB_4837				BindingDB_3924
BindingDB_50421027			BindingDB_3433				BindingDB_3955
BindingDB_4906			BindingDB_3482				BindingDB_3954
BindingDB_4889			BindingDB_3452				BindingDB_3809
BindingDB_4886			BindingDB_4825				BindingDB_3929
BindingDB_50420994			BindingDB_4849				BindingDB_3923
BindingDB_50421028			BindingDB_3435				BindingDB_3928
BindingDB_4922			BindingDB_6188				BindingDB_3823
BindingDB_4885			BindingDB_3453				BindingDB_3921
BindingDB_50065308			BindingDB_4844				BindingDB_3919
BindingDB_4890			BindingDB_3488				BindingDB_3920
BindingDB_4902			BindingDB_3465				BindingDB_3918
BindingDB_50421008			BindingDB_3471				BindingDB_3847
BindingDB_4892			BindingDB_3448
BindingDB_4901
BindingDB_4905
BindingDB_4884
BindingDB_50421026
BindingDB_50421017
BindingDB_50421000
BindingDB_50421011
BindingDB_4891
BindingDB_50420993
BindingDB_4882
BindingDB_4887
